# Supplementary material
Source: PubMed Central journal article supplement (PMC5752698)
Supplement: ajcr0007-2587-f4.pdf [file ajcr0007-2587-f4.pdf]

meEGFR: a predictive biomarker for mCRC

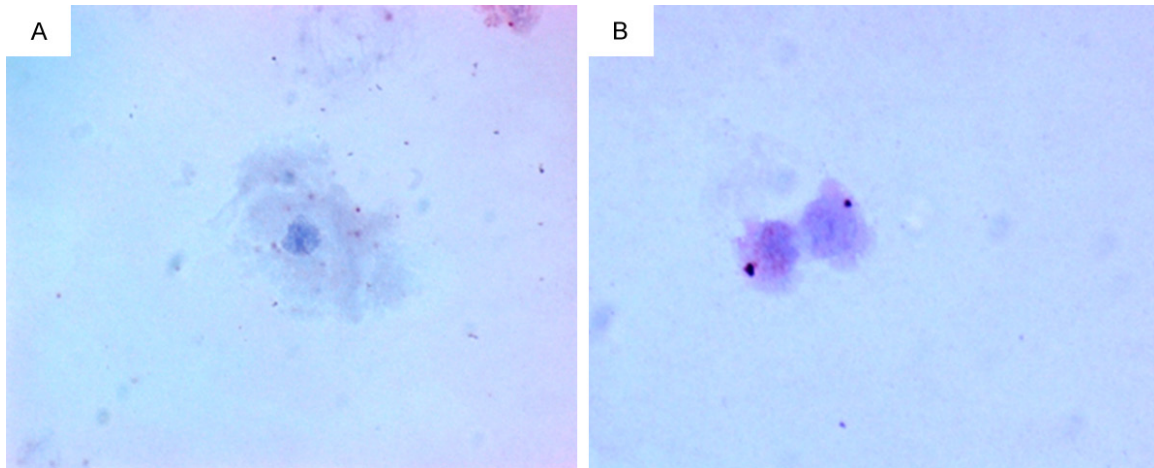

**Supplementary Figure 1.** Interpretation of immunohistochemical analysis for meEGFR-CTCs. A. meEGFR negative. B. meEGFR positive.

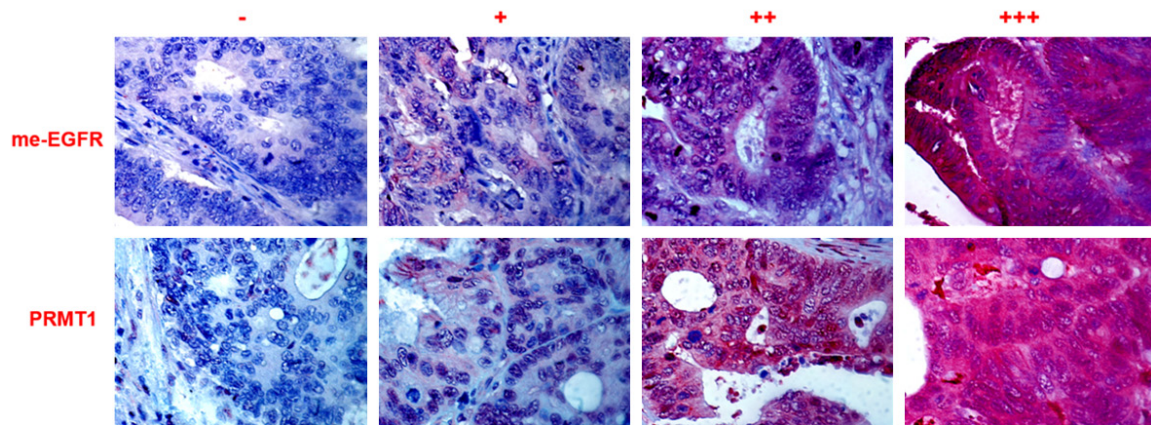

**Supplementary Figure 2.** Interpretation of immunohistochemical analysis for meEGFR on tumor tissues.

meEGFR: a predictive biomarker for mCRC

**Supplementary Table 1.** Association between Total CTCs count/meEGFR-CTCs and clinical-pathological and molecular factors

| Variable                    | Total CTCs count/7.5 ml |     | P value | meEGFR-CTCs    |            | P value |
|-----------------------------|-------------------------|-----|---------|----------------|------------|---------|
|                             | < 3                     | ≥ 3 |         | Non-detectable | Detectable |         |
| <b>Age</b>                  |                         |     |         |                |            |         |
| < 50 years                  | 15                      | 4   | 0.12    | 14             | 5          | 0.10    |
| ≥ 50 years                  | 16                      | 12  |         | 14             | 14         |         |
| <b>Sex</b>                  |                         |     |         |                |            |         |
| Female                      | 15                      | 7   | 0.76    | 14             | 8          | 0.60    |
| Male                        | 16                      | 9   |         | 14             | 11         |         |
| <b>Site</b>                 |                         |     |         |                |            |         |
| Right-sided                 | 9                       | 4   | 0.77    | 8              | 5          | 0.87    |
| Left-sided                  | 22                      | 12  |         | 20             | 14         |         |
| <b>Line of anti-EGFR Rx</b> |                         |     |         |                |            |         |
| 1 <sup>st</sup> line        | 3                       | 3   | 0.59    | 3              | 3          | 0.75    |
| 2 <sup>nd</sup> line        | 17                      | 9   |         | 15             | 11         |         |
| 3 <sup>rd</sup> line        | 11                      | 4   |         | 10             | 5          |         |
| <b>Previous irinotecan</b>  |                         |     |         |                |            |         |
| No                          | 18                      | 9   | 0.90    | 17             | 10         | 0.58    |
| Yes                         | 13                      | 7   |         | 11             | 9          |         |
| <b>Previous bevacizumab</b> |                         |     |         |                |            |         |
| No                          | 5                       | 6   | 0.10    | 5              | 6          | 0.28    |
| Yes                         | 26                      | 10  |         | 23             | 13         |         |
| <b>Liver metastasis</b>     |                         |     |         |                |            |         |
| No                          | 4                       | 44  | 0.85    | 5              | 6          | 0.28    |
| Yes                         | 24                      | 12  |         | 23             | 13         |         |
| <b>Lung metastasis</b>      |                         |     |         |                |            |         |
| No                          | 11                      | 10  | 0.08    | 12             | 9          | 0.76    |
| Yes                         | 20                      | 6   |         | 16             | 10         |         |
| <b>Differentiated</b>       |                         |     |         |                |            |         |
| Moderate                    | 25                      | 15  | 0.23    | 23             | 17         | 0.49    |
| Poorly                      | 6                       | 1   |         | 5              | 2          |         |
| <b>NRAS (n = 43)</b>        |                         |     |         |                |            |         |
| wt                          | 27                      | 14  | 0.65    | 24             | 17         | 0.81    |
| mt                          | 1                       | 1   |         | 1              | 1          |         |
| <b>BRAF (n = 45)</b>        |                         |     |         |                |            |         |
| wt                          | 26                      | 13  | 0.43    | 22             | 17         | 0.64    |
| mt                          | 3                       | 3   |         | 4              | 2          |         |
| <b>PIK3CA (n = 37)</b>      |                         |     |         |                |            |         |
| wt                          | 20                      | 13  | 0.58    | 16             | 17         | 0.32    |
| mt                          | 3                       | 1   |         | 3              | 1          |         |
| <b>MSI (n = 38)</b>         |                         |     |         |                |            |         |
| MSS/MSI-L                   | 24                      | 11  | 0.95    | 20             | 15         | 0.75    |
| MSI-H                       | 2                       | 1   |         | 2              | 1          |         |

wt: wild type, mt: mutation.

## meEGFR: a predictive biomarker for mCRC

**Supplementary Table 2.** Association between meEGFR ratio from CTCs and meEGFR expression from tissues

|            |        | meEGFR tissues  |                   | P value |
|------------|--------|-----------------|-------------------|---------|
|            |        | High expression | Low/No expression |         |
| CTCs ratio | < 0.23 | 3               | 5                 | 0.67    |
|            | ≥ 0.23 | 1               | 1                 |         |

**Supplementary Table 3.** Association between expression level of meEGFR and PRMT1

|       |                 | meEGFR         |                 | P value |
|-------|-----------------|----------------|-----------------|---------|
|       |                 | Low expression | High expression |         |
| PRMT1 | Low expression  | 54 (61.4%)     | 34 (44.7%)      | 0.03    |
|       | High expression | 34 (38.6%)     | 42 (55.3%)      |         |
